# Supplementary material for: Hispidulin Enhances TRAIL-Mediated Apoptosis via CaMKKβ/AMPK/USP51 Axis-Mediated Bim Stabilization
Source: MDPI journal article supplement (doi:10.3390/cancers11121960), 2019-12-06
Supplement: s1 [file s1]

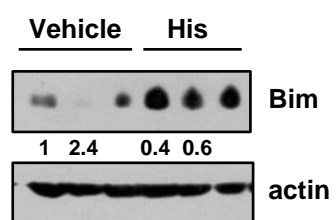

**Supplementary Figure 1. Effect of hispidulin on Bim expression in tumor tissues.** Protein expression was measured by western blotting.

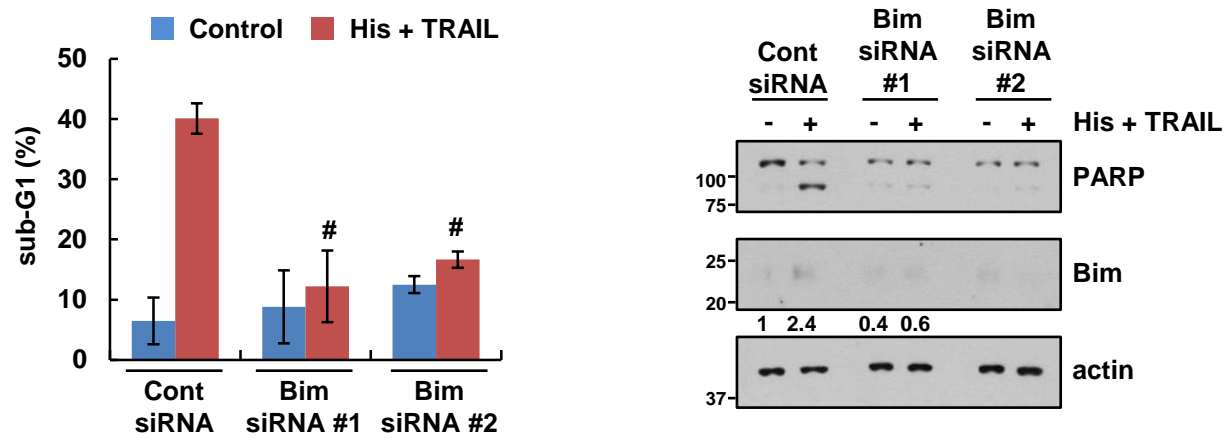

**Supplementary Figure 2. Bim is critical for hispidulin plus TRAIL-induced apoptosis.** A498 cells were transiently transfected with Bim siRNA or control siRNA. After transfection, cells were exposed to 30  $\mu$ M hispidulin and 50 ng/ml TRAIL for 24 h. The level of apoptosis was analyzed by measuring the sub-G1 fraction by flow cytometry. The protein levels were determined by Western blotting. The values represent the mean  $\pm$  SD from three independent experiments. #  $p < 0.05$  compared to the hispidulin plus TRAIL in control siRNA.

Figure 1A

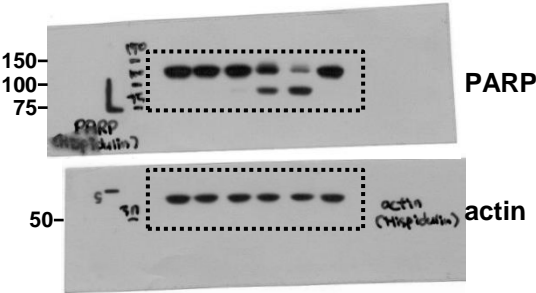

Figure 1B

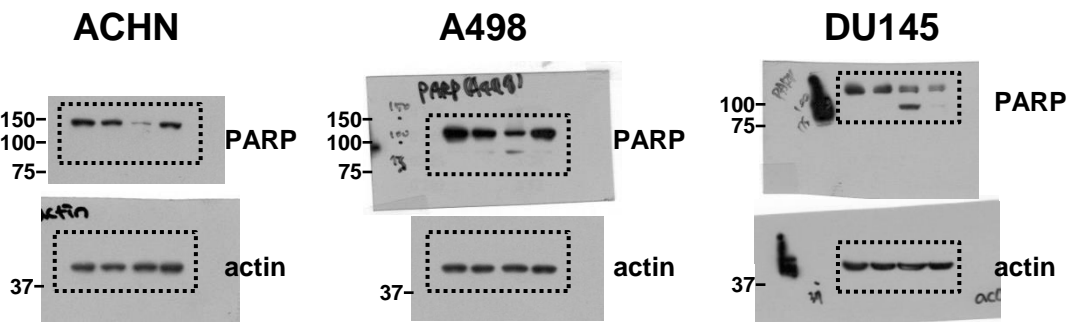

Figure 1F

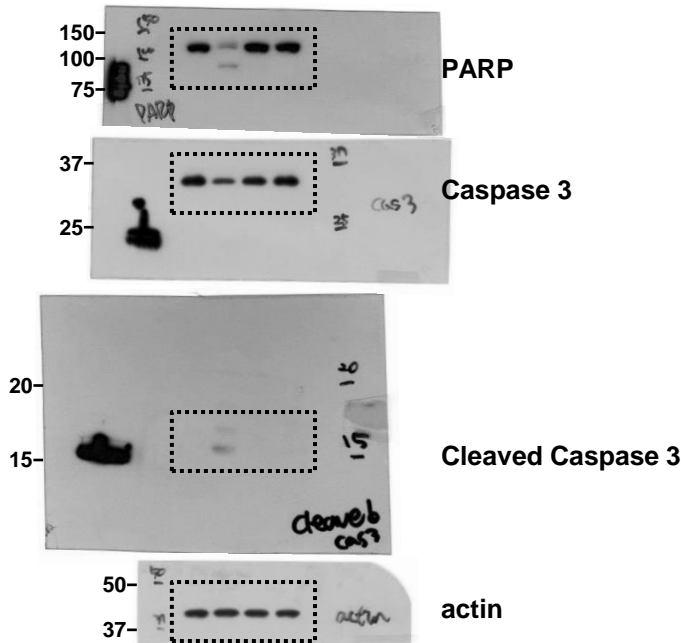

Supplementary Figure 3. Uncropped image for Figure 1.

**Figure 3B**

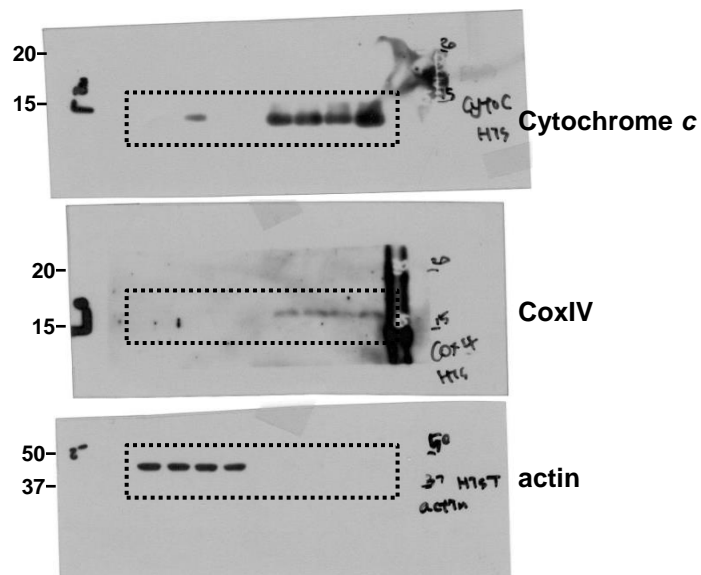

**Figure 3C**

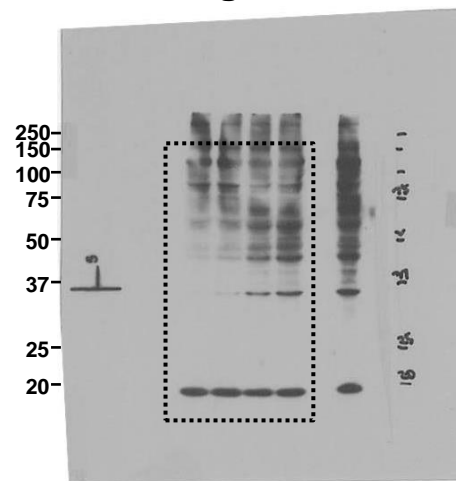

**Figure 3D**

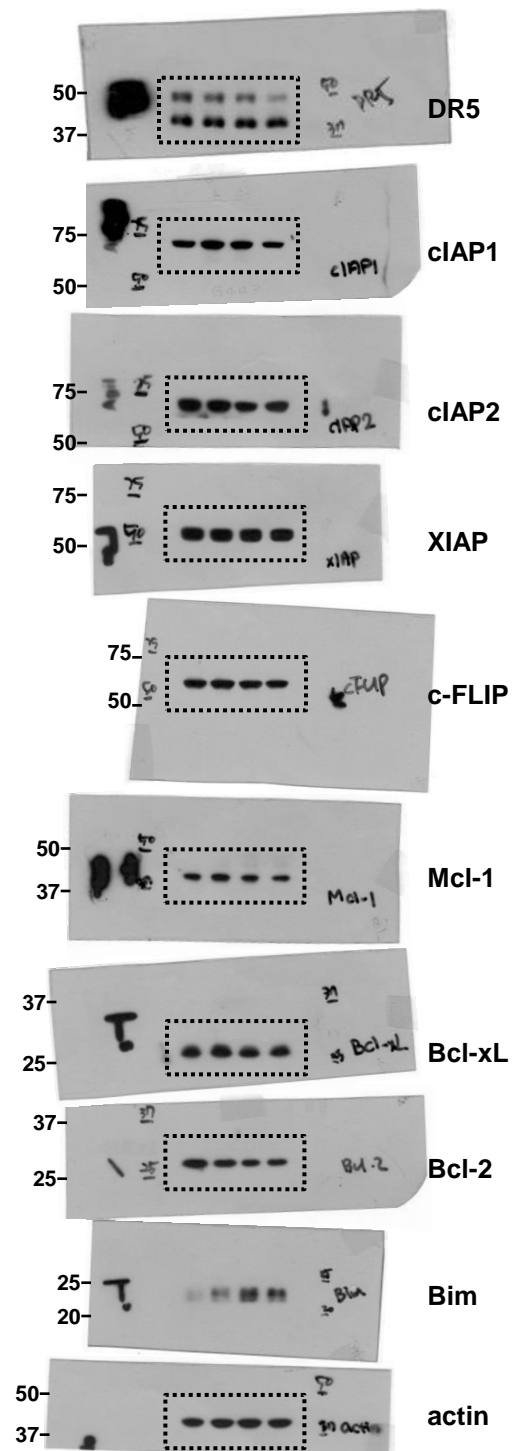

**Figure 3E**

**ACHN**

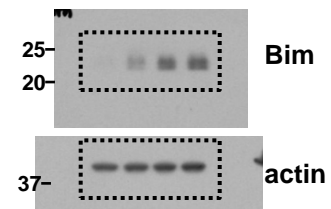

**A498**

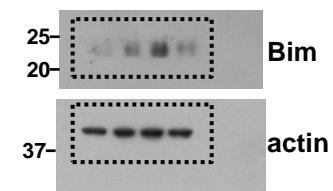

**DU145**

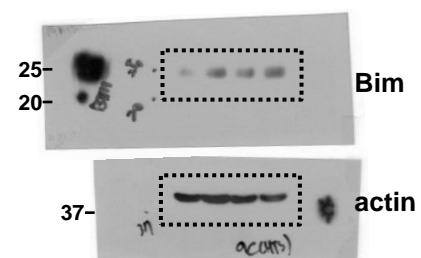

**Figure 4A**

**Caki**

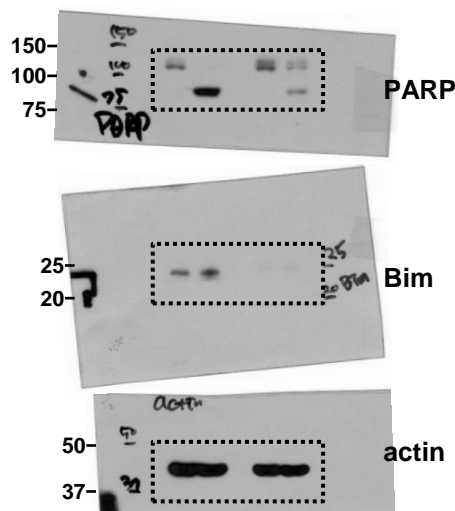

**A498**

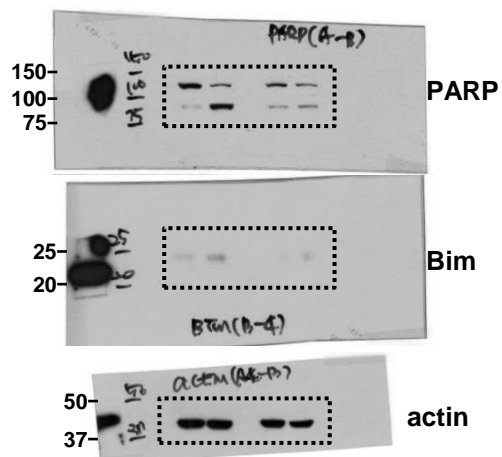

**Figure 4B**

**Caki**

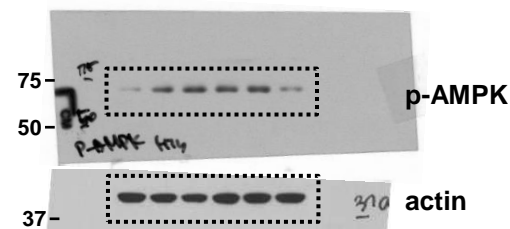

**A498**

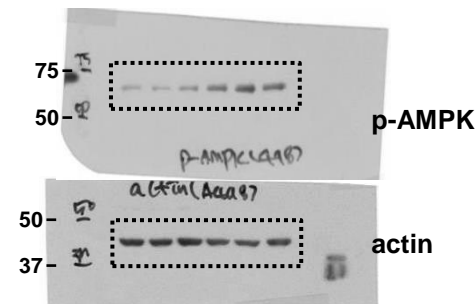

**Figure 4C**

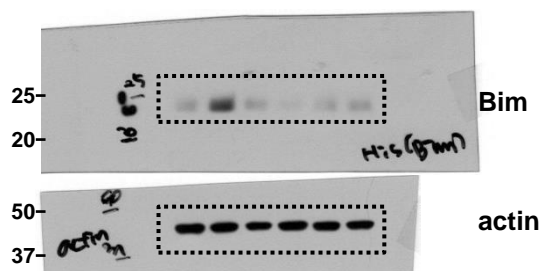

**Figure 4D**

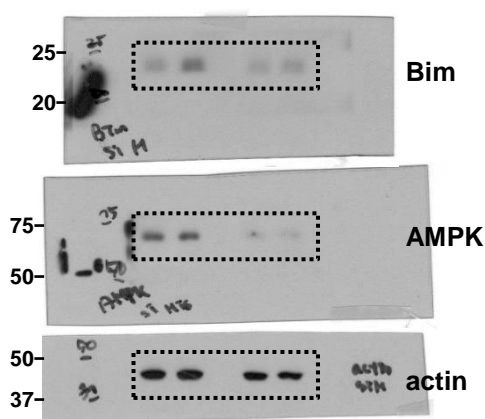

**Figure 4E**

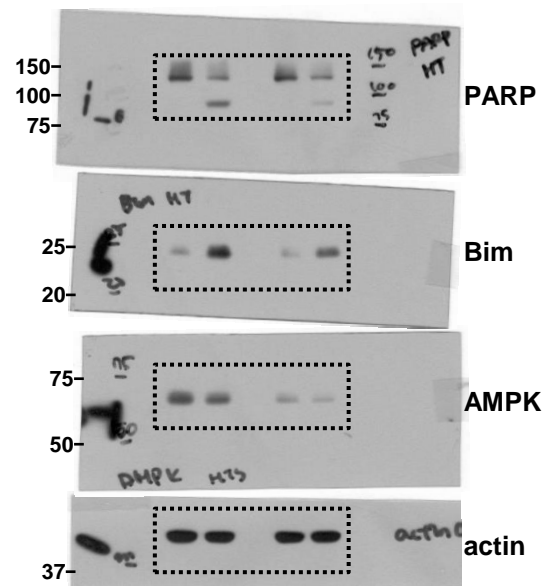

**Figure 4F**

**Left panel**

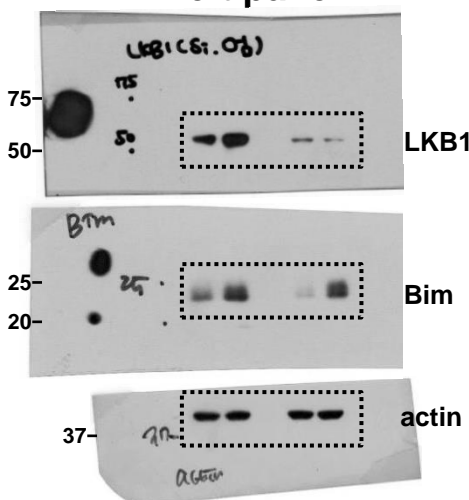

**Right panel**

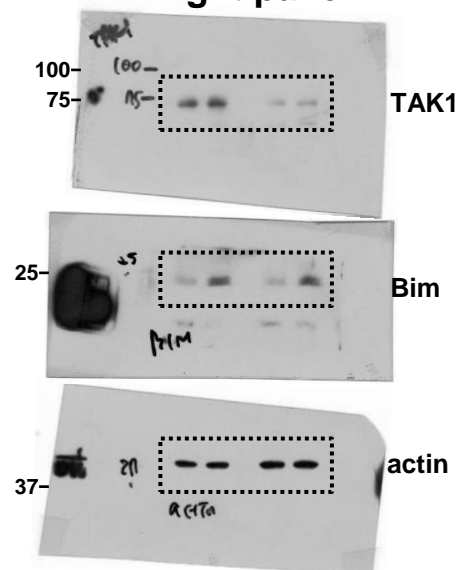

**Figure 4G**

**Caki**

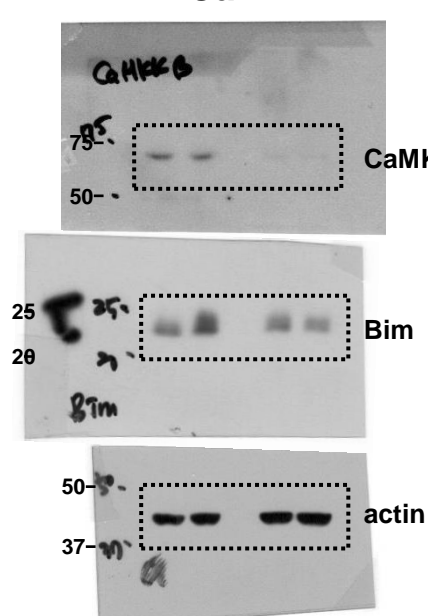

**A498**

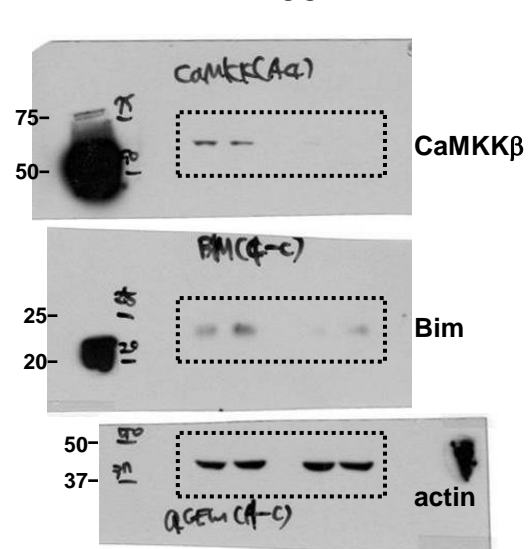

Figure 5A

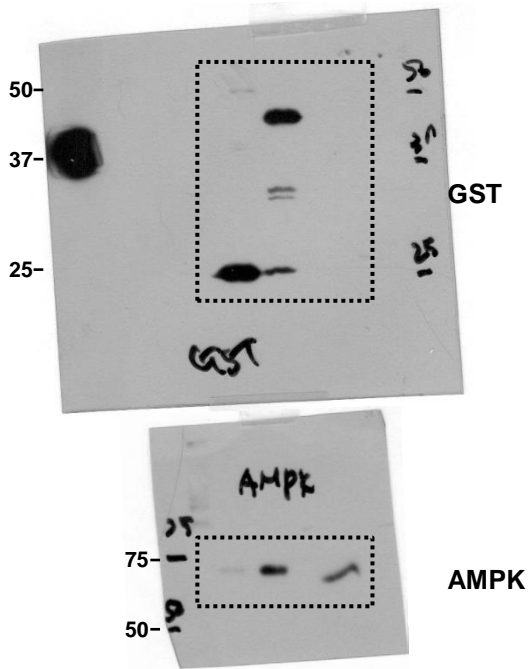

Figure 5B

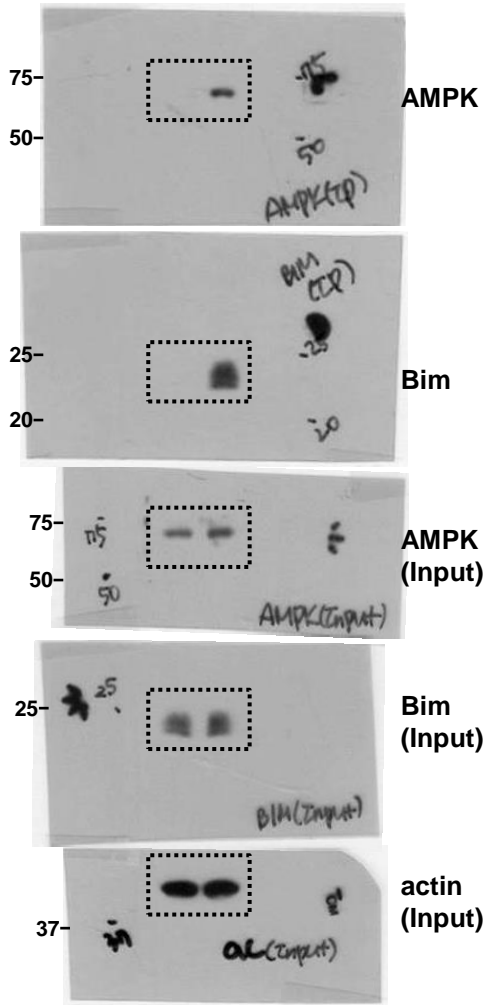

Figure 5C

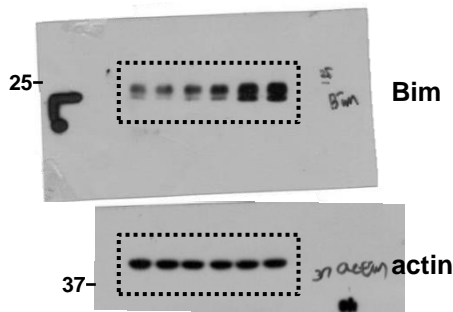

Figure 5D

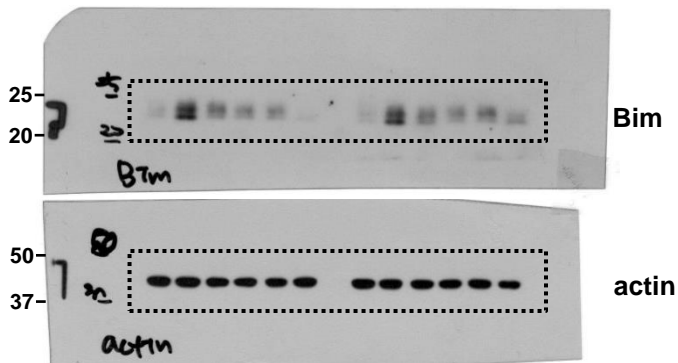

Figure 5F

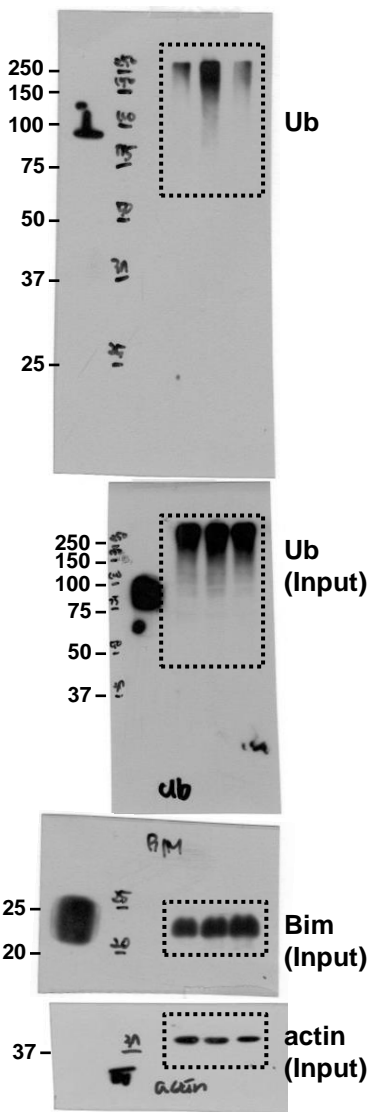

Figure 5G

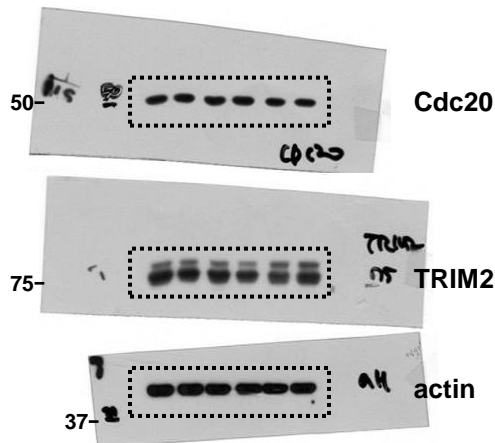

Figure 5E

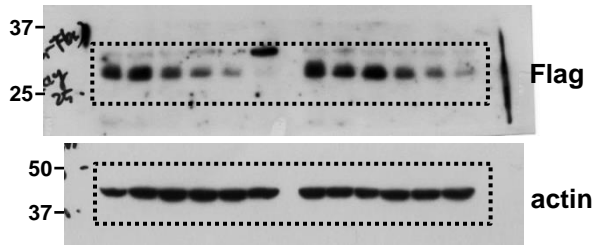

**Figure 6B**

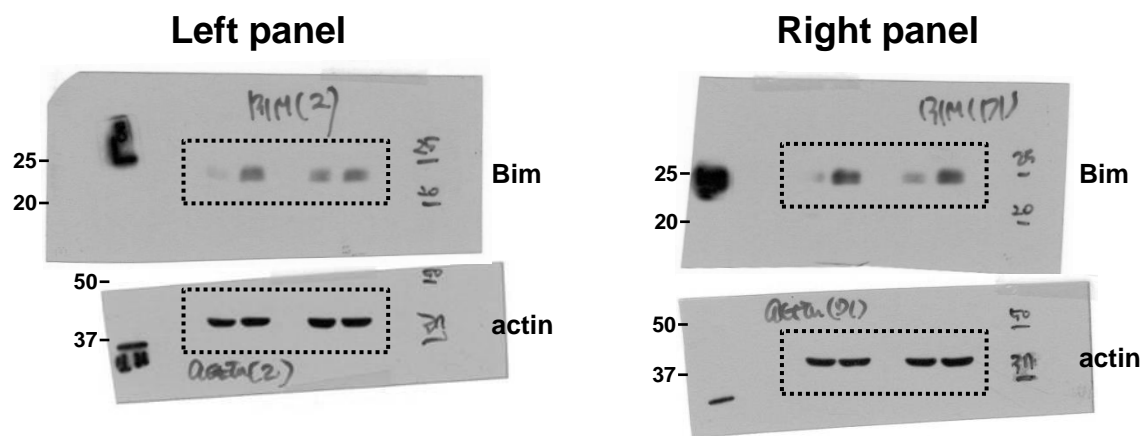

**Figure 6C**

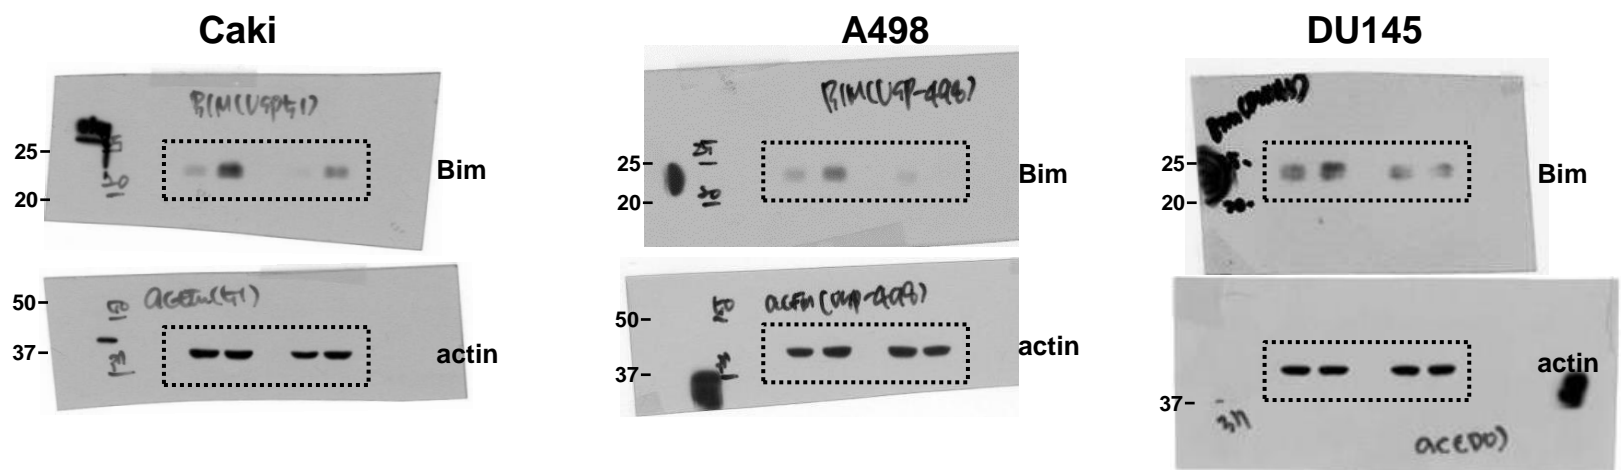

**Figure 6D**

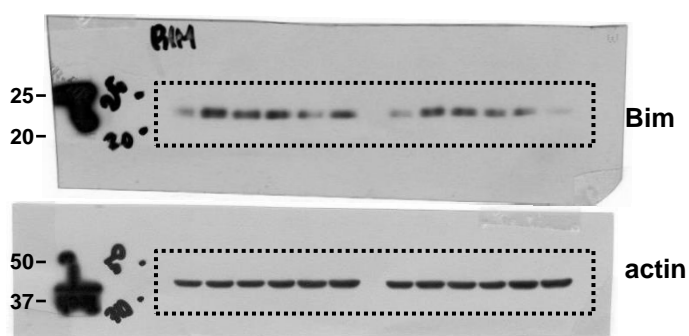

**Figure 6F**

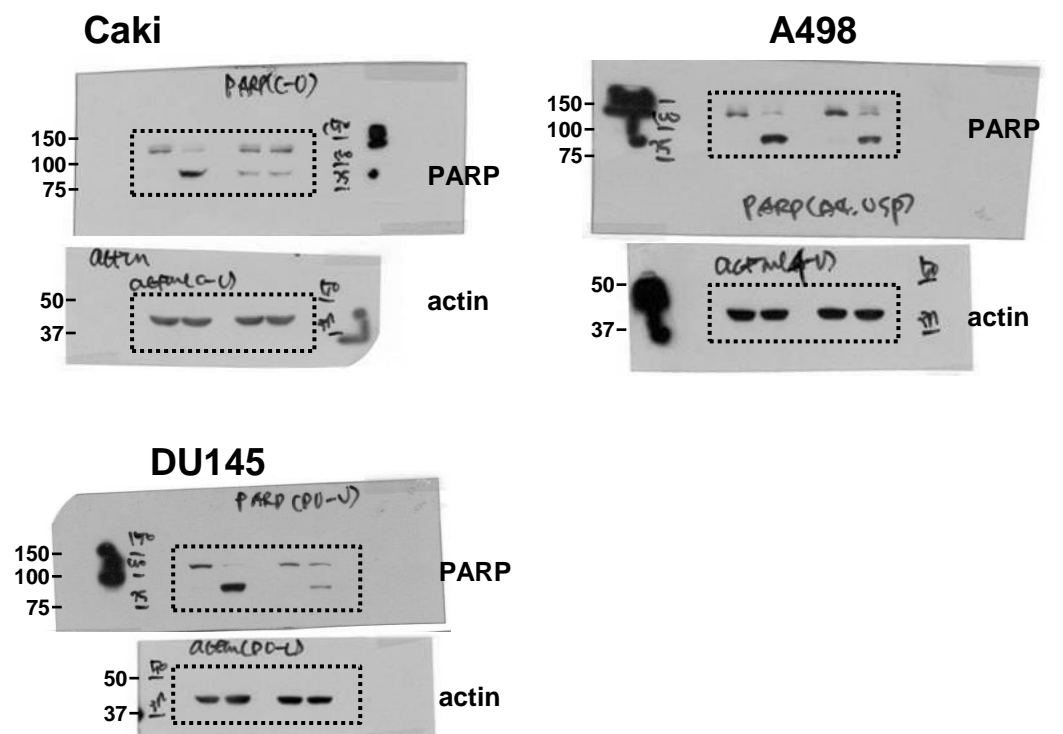

**Supplementary Figure 7. Uncropped image for Figure 6.**

Supplementary Figure 1.

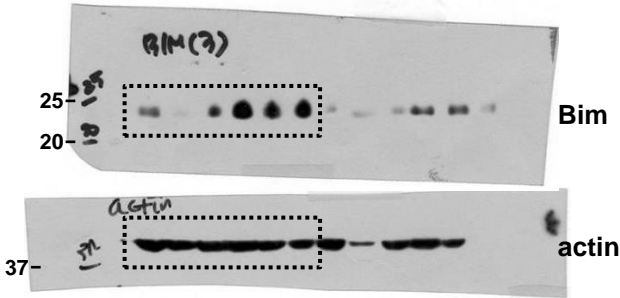

Supplementary Figure 2.

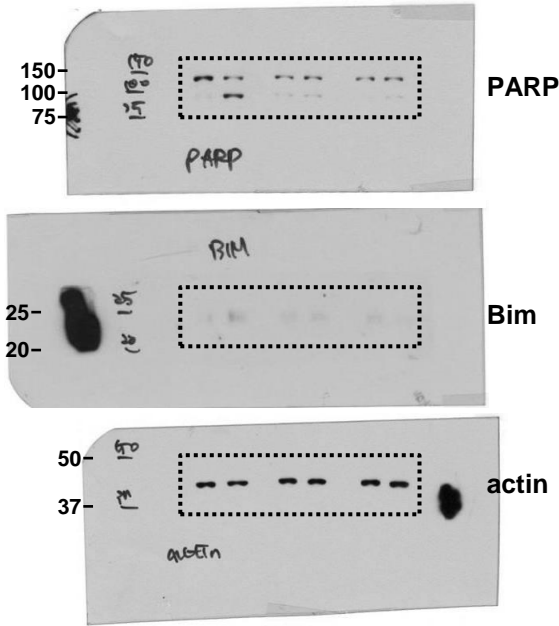

Supplementary Figure 8. Uncropped image for supplementary Figure 1 and 2.
